# Supplementary material
Source: PubMed Central journal article supplement (PMC2577844)
Supplement: NIHMS55828-supplement-01.pdf [file NIHMS55828-supplement-01.pdf]

## Supplemental Data

### Human Neutrophil Fc $\gamma$ Receptors Initiate and Play Specialized Nonredundant Roles in Antibody-Mediated Inflammatory Diseases

Naotake Tsuboi, Kenichi Asano, Michael Lauterbach, and Tanya N. Mayadas

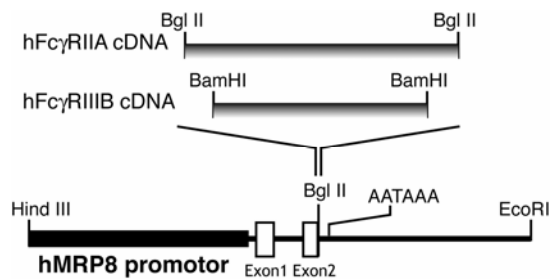

**Figure S1. Transgenic Construct of Human Neutrophil Fc $\gamma$ Rs**

Transgenic constructs were generated by inserting human Fc $\gamma$ RIIA or Fc $\gamma$ RIIIB cDNA into the human MRP8 promoter cassette as shown.

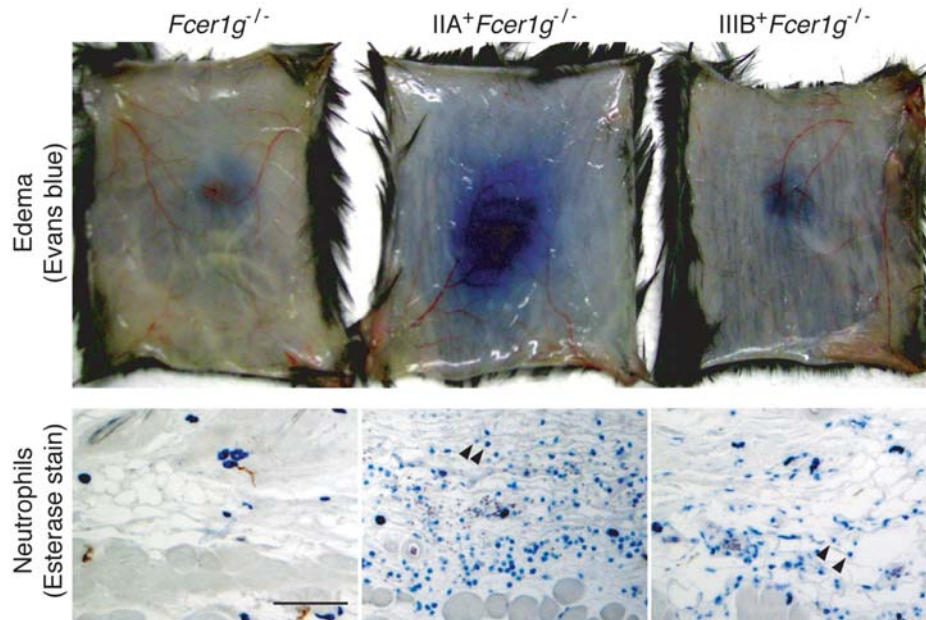

**Figure S2. Reverse Passive Arthus Reaction in Human Fc $\gamma$ R Transgenic Mouse**

The Reverse Passive Arthus reaction was induced by the intradermal administration of anti-OVA antibody and the intravenous injection of OVA with (upper panels) or without (lower panels) Evans blue dye. Representative pictures of the dorsal skin harvested 4 hr after anti-OVA injection are shown. Evan's blue leakage, a measurement of edema, is prominent in  $IIA^+Fcer1g^{-/-}$  but not  $Fcer1g^{-/-}$  and  $IIIB^+Fcer1g^{-/-}$  mice. Esterase-stained sections show accumulation of neutrophils (arrowheads) in the subcutaneous layers of transgenic mice while this was minimal in  $Fcer1g^{-/-}$  animals. The scale bar represents 100  $\mu$ m.
